# Supplementary material for: Control of Precursor Maturation and Disposal Is an Early Regulative Mechanism in the Normal Insulin Production of Pancreatic β-Cells
Source: PubMed Central journal article supplement (PMC3084858; doi:10.1371/journal.pone.0019446), 2011-04-29
Supplement: pone.0019446.s004.pdf [file pone.0019446.s004.pdf]

Table S1. Proportions of individual states of insulin precursor in Figure 1A

| Percentage             | Mean        | Mean      | Mean      | SD          | SD        | SD        | P               | P               |
|------------------------|-------------|-----------|-----------|-------------|-----------|-----------|-----------------|-----------------|
| Islets (20 wks of age) | Control (M) | Akita (M) | Akita (F) | Control (M) | Akita (M) | Akita (F) | C vs. A (M) (M) | C vs. A (M) (F) |
| Non-reduced Condition  |             |           |           |             |           |           |                 |                 |
| Monomers (a and b)     | 29.5        | 2.9       | 3.0       | 6.1         | 4.4       | 1.6       | <0.05           | <0.05           |
| Monomer a              | 17.4        | 0.5       | 0.4       | 1.5         | 0.3       | 0.3       | <0.05           | <0.05           |
| Monomer b              | 12.1        | 2.5       | 2.6       | 4.8         | 4.1       | 1.4       | 0.005           | <0.05           |
| Non-monomers (A-F)     | 70.5        | 97.1      | 97        | 6.1         | 4.4       | 1.6       | <0.05           | <0.05           |
| A                      | 6.1         | 0.0       | 0.0       | 3.4         | 0.0       | 0.0       | <0.05           | <0.05           |
| B                      | 3.3         | 0.1       | 0.3       | 1.1         | 0.2       | 0.4       | <0.05           | <0.05           |
| C                      | 5.0         | 0.7       | 1.3       | 0.5         | 0.7       | 0.4       | <0.05           | <0.05           |
| D                      | 3.0         | 6.9       | 7.3       | 1.3         | 1.7       | 1.0       | <0.05           | <0.05           |
| E                      | 4.4         | 10.3      | 10.7      | 2.1         | 5.7       | 0.8       | 0.04            | <0.05           |
| F                      | 48.7        | 79.0      | 77.4      | 1.4         | 10.5      | 2.6       | <0.05           | <0.05           |
| Reduced Condition      |             |           |           |             |           |           |                 |                 |
| Monomers (a and b)     | 90.2        | 95.7      | 95.8      | 2.0         | 16.5      | 16.2      | 0.7             | 0.8             |
| Monomer a              | 41.7        | 5         | 3.4       | 9.6         | 1.5       | 2.1       | <0.05           | <0.05           |
| Monomer b              | 48.5        | 90.7      | 92.4      | 11.6        | 16.1      | 43.3      | <0.05           | <0.05           |
| Non-monomers (A-F)     | 9.8         | 4.3       | 4.2       | 5.6         | 4.2       | 3.1       | 0.1             | 0.2             |

Control (C): *Ins2*<sup>+/+</sup>; Akita (A): *Ins2*<sup>+/*Akita*</sup>; M, male; F, female. Data are shown in Figure 1B.
