# Supplementary material for: Control of Precursor Maturation and Disposal Is an Early Regulative Mechanism in the Normal Insulin Production of Pancreatic β-Cells
Source: PubMed Central journal article supplement (PMC3084858; doi:10.1371/journal.pone.0019446), 2011-04-29
Supplement: pone.0019446.s005.pdf [file pone.0019446.s005.pdf]

Table S2. Percentage of proinsulin monomers under non-reduced versus reduced condition in Figure 1A

| Percentage                  | Gel Condition | Control | Akita (M) | Akita (F) |
|-----------------------------|---------------|---------|-----------|-----------|
| Mean                        | Non-Reduced   | 71.1    | 4.7       | 9.8       |
| Mean                        | Reduced       | 100     | 100       | 100       |
| SD                          | Non-Reduced   | 3.6     | 3.3       | 6.8       |
| SD                          | Reduced       | 13.5    | 11.0      | 17.0      |
| P (Non-Reduced vs. Reduced) |               | 0.02    | <0.005    | <0.005    |

Control: *Ins2*<sup>+/+</sup>; Akita: *Ins2*<sup>+/*Akita*</sup>; M, male; F, female. Data are shown in Figure 1C.
