# Supplementary material for: Control of Precursor Maturation and Disposal Is an Early Regulative Mechanism in the Normal Insulin Production of Pancreatic β-Cells
Source: PubMed Central journal article supplement (PMC3084858; doi:10.1371/journal.pone.0019446), 2011-04-29
Supplement: pone.0019446.s006.pdf [file pone.0019446.s006.pdf]

Table S3. Proportions of proinsulin monomers and non-monomers  
in the *Ins2*<sup>+/+</sup> and *Ins2*<sup>+/Akita</sup> islets in Figure 1A

| Percentage            | State        | Control<br>(M) | Akita<br>(M) | Akita<br>(F) |
|-----------------------|--------------|----------------|--------------|--------------|
| Mean                  | Monomers     | 71.1           | 4.7          | 9.8          |
| Mean                  | Non-monomers | 28.9           | 95.3         | 90.2         |
| SD                    | Monomers     | 3.6            | 3.3          | 6.8          |
| SD                    | Non-monomers | 3.6            | 3.3          | 6.8          |
| P (Control vs. Akita) |              |                | <0.005       | <0.005       |

Control: *Ins2*<sup>+/+</sup>; Akita: *Ins2*<sup>+/Akita</sup>; M, male; F, female. Data are shown in Figure 1D.
