# Supplementary material for: Control of Precursor Maturation and Disposal Is an Early Regulative Mechanism in the Normal Insulin Production of Pancreatic β-Cells
Source: PubMed Central journal article supplement (PMC3084858; doi:10.1371/journal.pone.0019446), 2011-04-29
Supplement: pone.0019446.s007.pdf [file pone.0019446.s007.pdf]

Table S4. Proportions of nascent proinsulin monomers and non-monomers precipitated by insulin (Ins) or C-peptide (Cp) antisera from mouse islets labeled for 30 minutes

| Percentage                         | Proinsulin State | Ins IP | Cp IP  |
|------------------------------------|------------------|--------|--------|
| Mean                               | Monomers         | 58.2   | 39.7   |
| Mean                               | Non-monomers     | 41.8   | 60.3   |
| SD                                 | Monomers         | 4.2    | 7.6    |
| SD                                 | Non-monomers     | 4.2    | 7.6    |
| P (Monomers; Ins IP vs. Cp IP)     |                  |        | <0.005 |
| P (Non-monomers; Ins IP vs. Cp IP) |                  |        | <0.005 |

(Shown in Figure 2B)
