# Supplementary material for: Control of Precursor Maturation and Disposal Is an Early Regulative Mechanism in the Normal Insulin Production of Pancreatic β-Cells
Source: PubMed Central journal article supplement (PMC3084858; doi:10.1371/journal.pone.0019446), 2011-04-29
Supplement: pone.0019446.s008.pdf [file pone.0019446.s008.pdf]

Table S5. Proportions of nascent proinsulin monomers and non-monomers precipitated by C-peptide antisera from *Ins2<sup>+/+</sup>* and *Ins2<sup>+/*Akita*</sup>* islets labeled for 45 minutes

| Percentage                            | Proinsulin State | Control | Akita (M) |
|---------------------------------------|------------------|---------|-----------|
| Mean                                  | Monomers         | 71.0    | 22.8      |
| Mean                                  | Non-monomers     | 29.0    | 77.2      |
| SD                                    | Monomers         | 14.5    | 5.0       |
| SD                                    | Non-monomers     | 14.5    | 5.0       |
| P (Monomers of Control vs. Akita)     |                  |         | <0.005    |
| P (Non-monomers of Control vs. Akita) |                  |         | <0.005    |

(Shown in Figure 2D)
