# Supplementary material for: Control of Precursor Maturation and Disposal Is an Early Regulative Mechanism in the Normal Insulin Production of Pancreatic β-Cells
Source: PubMed Central journal article supplement (PMC3084858; doi:10.1371/journal.pone.0019446), 2011-04-29
Supplement: pone.0019446.s009.pdf [file pone.0019446.s009.pdf]

Table S6. Proportions of nascent proinsulin monomers and non-monomers in human islets labeled for 30 minutes

| Percentage | Proinsulin State | Ins/Cp IP |
|------------|------------------|-----------|
| Mean       | Monomers         | 65.7      |
| Mean       | Non-monomers     | 34.3      |
| SD         | Monomers         | 3.4       |
| SD         | Non-monomers     | 3.4       |

(Shown in Figure 2F)
