# Supplementary material for: Control of Precursor Maturation and Disposal Is an Early Regulative Mechanism in the Normal Insulin Production of Pancreatic β-Cells
Source: PubMed Central journal article supplement (PMC3084858; doi:10.1371/journal.pone.0019446), 2011-04-29
Supplement: pone.0019446.s010.pdf [file pone.0019446.s010.pdf]

Table S7. Completely folded  $^{125}\text{I}$ -proinsulin in *Ins2<sup>+/+</sup>* and *Ins2<sup>+Akita</sup>* islet protein extracts that was subjected to IP and electrophoresis did not form significant aggregates

| Percentage | Gel Condition | Proinsulin State | Control | Akita |
|------------|---------------|------------------|---------|-------|
| Mean       | Non-reduced   | Monomers         | 99.5    | 98.9  |
| Mean       | Non-reduced   | Non-monomers     | 0.5     | 0.1   |
| Mean       | Reduced       | Monomers         | 99.8    | 99.8  |
| Mean       | Reduced       | Non-monomers     | 0.2     | 0.2   |
| SD         | Non-reduced   | Monomers         | 2.0     | 2.3   |
| SD         | Non-reduced   | Non-monomers     | 2.0     | 2.3   |
| SD         | Reduced       | Monomers         | 5.3     | 7.4   |
| SD         | Reduced       | Non-monomers     | 5.3     | 7.4   |

(Shown in Figure S2)
