# Supplementary material for: Control of Precursor Maturation and Disposal Is an Early Regulative Mechanism in the Normal Insulin Production of Pancreatic β-Cells
Source: PubMed Central journal article supplement (PMC3084858; doi:10.1371/journal.pone.0019446), 2011-04-29
Supplement: pone.0019446.s011.pdf [file pone.0019446.s011.pdf]

Table S8. Proportions of proinsulin monomers and non-monomers in C-peptide (Cp) or insulin (Ins) immunoprecipitates obtained from MIN6  $\beta$ -cells labeled for 5, 15, or 30 minutes

| MIN6              | Proinsulin State | Cp-P5 | Cp-P15 | Cp-P30 | Ins-P5 | Ins-P15 | Ins-P30 |
|-------------------|------------------|-------|--------|--------|--------|---------|---------|
| Mean              | Monomers         | 41.3  | 42.5   | 49.1   | 63.5   | 73.4    | 76.1    |
| Mean              | Non-monomers     | 58.7  | 57.5   | 50.9   | 36.5   | 26.6    | 23.9    |
| SD                | Monomers         | 9.2   | 9.0    | 14.0   | 18.8   | 17.3    | 15.0    |
| SD                | Non-monomers     | 9.2   | 9.0    | 14.0   | 18.8   | 17.3    | 15.0    |
| P (p5 vs. others) |                  |       | 0.83   | 0.28   |        | 0.362   | 0.23    |

P5, 5-min pulse; P15, 15-min pulse; P30; 30-min pulse. Data are shown in Figure 3B.
