# Supplementary material for: Control of Precursor Maturation and Disposal Is an Early Regulative Mechanism in the Normal Insulin Production of Pancreatic β-Cells
Source: PubMed Central journal article supplement (PMC3084858; doi:10.1371/journal.pone.0019446), 2011-04-29
Supplement: pone.0019446.s012.pdf [file pone.0019446.s012.pdf]

Table S9. Proportions of islet amyloid polypeptide precursor monomers and non-monomers in MIN6  $\beta$ -cells labeled for 5, 15, or 30 minutes

| Percentage        | ProlAPP State | P5   | P15   | P30    |
|-------------------|---------------|------|-------|--------|
| Mean              | Monomers      | 76.5 | 83.6  | 88.3   |
| Mean              | Non-monomers  | 23.5 | 16.4  | 11.7   |
| SD                | Monomers      | 4.0  | 2.1   | 3.5    |
| SD                | Non-monomers  | 4.0  | 2.1   | 3.5    |
| P (P5 vs. others) |               |      | 0.006 | <0.005 |

P5, 5-min pulse; P15, 15-min pulse; P30; 30-min pulse. Data are shown in Figure 3D.
