# Supplementary material for: Control of Precursor Maturation and Disposal Is an Early Regulative Mechanism in the Normal Insulin Production of Pancreatic β-Cells
Source: PubMed Central journal article supplement (PMC3084858; doi:10.1371/journal.pone.0019446), 2011-04-29
Supplement: pone.0019446.s013.pdf [file pone.0019446.s013.pdf]

Table S10. Proportions of nascent proinsulin monomers and non-monomers in MIN6  $\beta$ -cells chased for the indicated times (minutes) with/without antimycin, DTT, or GSSG after a 5-min pulse

| Percentage        | Proinsulin State | C3   | C6   | C12  | C12-Antimycin | C12-DTT | C12-GSSG |
|-------------------|------------------|------|------|------|---------------|---------|----------|
| Mean              | Monomers         | 46.3 | 49.9 | 53.4 | 16.5          | 80.0    | 53.7     |
| Mean              | Non-monomers     | 53.7 | 50.1 | 46.6 | 83.5          | 20.0    | 46.3     |
| SD                | Monomers         | 5.2  | 4.8  | 5.0  | 1.9           | 7.2     | 7.4      |
| SD                | Non-monomers     | 5.2  | 4.8  | 5.0  | 1.9           | 7.2     | 7.4      |
| P (c3 vs. others) |                  |      | 0.3  | 0.04 | <0.005        | <0.005  | 0.08     |
| P(c12 vs. others) |                  | 0.04 | 0.2  |      | <0.005        | <0.005  | 0.9      |

(Shown in Figure 4B)
