# Supplementary material for: Control of Precursor Maturation and Disposal Is an Early Regulative Mechanism in the Normal Insulin Production of Pancreatic β-Cells
Source: PubMed Central journal article supplement (PMC3084858; doi:10.1371/journal.pone.0019446), 2011-04-29
Supplement: pone.0019446.s014.pdf [file pone.0019446.s014.pdf]

Table S11. Proportions of nascent PC1/3 monomers and non-monomers in MIN6  $\beta$ -cells chased for the indicated times (minutes) with/without antimycin, DTT, or GSSG after a 5-min pulse

| Percentage         | PC1/3 State  | C3     | C6   | C12  | C12-Antimycin | C12-DTT | C12-GSSG |
|--------------------|--------------|--------|------|------|---------------|---------|----------|
| Mean               | Monomers     | 85.0   | 89.4 | 90.0 | 94.7          | 95.6    | 94.4     |
| Mean               | Non-monomers | 15.0   | 10.6 | 10.0 | 5.3           | 4.4     | 5.6      |
| SD                 | Monomers     | 2.8    | 2.7  | 1.8  | 1.0           | 3.0     | 2.6      |
| SD                 | Non-monomers | 2.8    | 2.7  | 1.8  | 1.0           | 3.0     | 2.6      |
| P (12C vs. Others) |              | <0.005 | 0.5  |      | <0.005        | <0.005  | 0.2      |

(Shown in Figure 4E)
