# Supplementary material for: Control of Precursor Maturation and Disposal Is an Early Regulative Mechanism in the Normal Insulin Production of Pancreatic β-Cells
Source: PubMed Central journal article supplement (PMC3084858; doi:10.1371/journal.pone.0019446), 2011-04-29
Supplement: pone.0019446.s015.pdf [file pone.0019446.s015.pdf]

Table S12. Relative levels of nascent proinsulin in MIN6  $\beta$ -cells chased for the indicated times (minutes) with/without antimycin, DTT, or GSSG after a 5-min pulse

| Percentage             | C3     | C6     | C12    | C12-Antimycin | C12-DTT | C12-GSSG |
|------------------------|--------|--------|--------|---------------|---------|----------|
| Mean                   | 35.1   | 36.6   | 28.7   | 74.2          | 100.0   | 27.3     |
| SD                     | 3.0    | 3.4    | 2.6    | 6.7           | 10.3    | 2.9      |
| P (c12 DTT vs. others) | <0.005 | <0.005 | <0.005 | <0.005        |         | <0.005   |
| P (C12 vs. others)     | <0.005 | <0.005 |        | <0.005        | <0.005  | 0.4      |

(Shown in Figure 4C)
