# Supplementary material for: Control of Precursor Maturation and Disposal Is an Early Regulative Mechanism in the Normal Insulin Production of Pancreatic β-Cells
Source: PubMed Central journal article supplement (PMC3084858; doi:10.1371/journal.pone.0019446), 2011-04-29
Supplement: pone.0019446.s016.pdf [file pone.0019446.s016.pdf]

Table S13. Relative levels of nascent PC1/3 in MIN6  $\beta$ -cells chased for the indicated times (minutes) with/without antimycin, DTT, or GSSG after a 5-min pulse

| Percentage         | C3   | C6   | C12  | C12-Antimycin | C12-DTT | C12-GSSG |
|--------------------|------|------|------|---------------|---------|----------|
| Mean               | 85.2 | 87.0 | 87.0 | 100.0         | 86.9    | 94.9     |
| SD                 | 4.3  | 5.9  | 4.1  | 4.9           | 5.1     | 5.8      |
| P (c12 vs. others) | 0.5  | 1.0  |      | <0.005        | 1.0     | 0.7      |

(Shown in Figure 4F)
