# Supplementary material for: Control of Precursor Maturation and Disposal Is an Early Regulative Mechanism in the Normal Insulin Production of Pancreatic β-Cells
Source: PubMed Central journal article supplement (PMC3084858; doi:10.1371/journal.pone.0019446), 2011-04-29
Supplement: pone.0019446.s018.pdf [file pone.0019446.s018.pdf]

Table S15. Relative levels of nascent proinsulin in MIN6  $\beta$ -cells chased for the indicated times (minutes) with/without antimycin after a 15-min pulse

| Percentage                   | C3     | C30    | C60    | C60-Antimycin |
|------------------------------|--------|--------|--------|---------------|
| Mean                         | 78.3   | 52.4   | 24.7   | 100           |
| SD                           | 4.2    | 4      | 3.3    | 9.7           |
| P (C60-Antimycin vs. Others) | <0.005 | <0.005 | <0.005 |               |

(Shown in Figure 5C)
