# Supplementary material for: Control of Precursor Maturation and Disposal Is an Early Regulative Mechanism in the Normal Insulin Production of Pancreatic β-Cells
Source: PLoS One. 2011 Apr 29;6(4):e19446. doi: 10.1371/journal.pone.0019446 (PMC3084858; doi:10.1371/journal.pone.0019446)
Supplement: Table S14 — Proportions of nascent proinsulin monomers and nom-monomers in MIN6 β-cells chased for the indicated times with/without antimycin after a 15-min pulse. (PDF) [file pone.0019446.s017.pdf]

Table S14. Proportions of nascent proinsulin monomers and non-monomers in MIN6  $\beta$ -cells chased for the indicated times (minutes) with/without antimycin after a 15-min pulse

| Percentage               | Proinsulin State | C3     | C30  | C60 | C60A   |
|--------------------------|------------------|--------|------|-----|--------|
| Mean                     | Monomers         | 54     | 72   | 83  | 32     |
| Mean                     | Non-monomers     | 46     | 28   | 17  | 68     |
| SD                       | Monomers         | 2.7    | 6.4  | 9.2 | 3.6    |
| SD                       | Non-monomers     | 2.7    | 6.4  | 9.2 | 3.6    |
| P (Non-monomers, C60 vs. |                  | <0.005 | 0.04 |     | <0.005 |

(Shown in Figure 5B)
